# Supplementary material for: The role of sodium fluorescein in pediatric supratentorial intra-axial tumor resection: new insights from a monocentric series of 33 consecutive patients
Source: Research Square preprint supplement (doi:10.21203/rs.3.rs-2114162/v1), 2022-10-19
Supplement: Supplementary file 1 [file 0b3be90a6e10fba8649d8e14.docx]

**TABLE 1 🡪 Characteristics of the patients and main results**

| **Nr.** | **Age** | **Gender** | **DOS** | **Clinical Presentation** | **LPS pre-op** | **Tumor Location** | **Tumor Volume (cm3)** | **Tumor Enhancement** | **Fluorescence Intensity** | **Intra-op side Effects** | **Surgeon's Opinion** | **IONM** | **Residual Fluorescence (Y/N - explanation)** | **Residual Volume (%)** | **Residual Volume (cm3)** | **Histology** | **LPS post-op** | **FU (Timing)** | **FU (Radiological)** | **FU (KPS/LPS)** |
| --- | --- | --- | --- | --- | --- | --- | --- | --- | --- | --- | --- | --- | --- | --- | --- | --- | --- | --- | --- | --- |
| **1** | 6 | F | 08/03/16 | sporadic headache, visual disturbance | 80 | hypotalamus-chiasma | 2.76 | homogeneous and intense | moderately fluorescent | no | useful | no | N | 0 | 0 | pilocytic astrocytoma (WHO I) | 80 | 70 | tumor recurrency (--> CHT) | 54 |
| **2** | 11 | F | 27/06/16 | seizures, mild cognitive impairment | 90 | right temporal | 2.76 | intense enhancement of the solid component with a large cyst | highly fluorescent | no | Useful | no | N | 0 | 0 | papillary glioneuronal tumor (WHO I) | 90 | 100 | tumor free | 53 |
| **3** | 12 | M | 12/09/16 | worsening of left motor hemisyndrome; FU | 60 | mesencephalic-talamic | 47.88 | peripheral with central necrosis | moderately fluorescent | no | useful | yes | Y – incomplete resection of the fluorescent component: infiltration of the basal ganglia and thalamus | 4.5 | 2.18 | pilocytic astrocytoma (WHO I) | 70 | 90 | stable tumor | 58 |
| **4** | 3 | F | 07/11/16 | communication and relationship impairment, global psycomotor delay | 90 | left lateral ventricle | 6.1 | heterogeneous and intense | moderately fluorescent | no | not essential | no | N | 0 | 0 | choroid plexus papilloma (WHO I) | 90 | 100 | tumor free | 46 |
| **5** | 3 | F | 10/03/17 | NF1; right hemisyndrome | 80 | left basal ganglia | 2.76 | peripheral with central necrosis | moderately fluorescent | no | Useful | yes | N | 0 | 0 | pilocytic astrocytoma (WHO I) | 90 | 90 | stable tumor | 62 |
| **6** | 6 | F | 16/03/17 | functional impairment right superior limb; repetitive movements right hand and dystonic posture; aphasia | 80 | left basal ganglia, left lateral ventricle | 28 | intense enhancement of the solid component with a large cyst | moderately fluorescent (bright cystic fluid) | no | useful | yes | Y – incomplete resection of the fluorescent component: infiltration of the CST | 8.3 | 2.34 | pilocytic astrocytoma (WHO I) | 70 | 90 | progression disease (--> ReSurgery - 20) | 33 |
| **7** | 5 | F | 04/05/17 | FU | 60 | left temporo-parieto-occipital | 7.48 | heterogeneous and intense | moderately fluorescent | no | useful | no | N | 0 | 0 | anaplastic pleomorphic xantoastrocytoma (WHO III) | 70 | 80 | tumor free | 59 |
| **8** | 8 | M | 10/05/17 | FU, ipovisus, hormonal deficit (early puberty), vomiting | 70 | sellar and soprasellar | 39.38 | heterogeneous and intense | moderately fluorescent | no | not essential | yes | Y – incomplete resection of the fluorescent component: infiltration of the optic chiasm | 4.4 | 13.9 | ganglioglioma (WHO I) | 70 | 70 | stable tumor | 42 |
| **9** | 16 | M | 06/06/17 | generalized seizures | 100 | left frontal | 0.14 | heterogeneous and faint | faintly fluorescent | no | partial useful | no | N | 0 | 0 | ganglioglioma (WHO I) | 100 | 100 | tumor free | 53 |
| **10** | 17 | F | 18/01/18 | seizures, cognitive deficit | 80 | left temporal | 0,05 | homogeneous and intense | highly fluorescent | no | useful | no | N | 0 | 0 | ganglioglioma + subependymal giant cell astrocytoma (WHO I) | 80 | 90 | tumor free | 42 |
| **11** | 13 | F | 28/02/18 | headache, dysphoria | 90 | left thalamic | 0.86 | heterogeneous and intense | highly fluorescent | no | useful | yes | N | 0 | 0 | ependimoblastoma (WHO IV) | 90 | 80 | tumor recurrency (--> ReSurgery - 22) | 24 |
| **12** | 3 | F | 04/07/18 | abnormal posture of the head | 90 | right temporal | 7.33 | homogeneous and intense | highly fluorescent | no | useful | no | Y – incomplete resection of the fluorescent component: infiltration of the basal ganglia and thalamus | 1.5 | 0.11 | ganglioglioma (WHO I) | 90 | 100 | stable tumor | 46 |
| **13** | 12 | F | 04/07/18 | seizure | 90 | left temporal | 12.34 | homogeneous and intense | highly fluorescent | no | useful | no | N | 0 | 0 | pleomorphic xanthoastrocytoma (WHO II) | 90 | 90 | tumor free | 47 |
| **14** | 17 | M | 12/07/18 | seizure | 90 | left parieto-occipital | 3.8 | intense enhancement of the solid component with a large cyst | highly fluorescent | no | useful | no | N | 0 | 0 | pilocytic astrocytoma (WHO I) | 90 | 90 | tumor free | 46 |
| **15** | 14 | M | 12/02/19 | seizure | 90 | right temporal | 38.5 | intense enhancement of the solid component with a large cyst | highly fluorescent (bright cystic fluid) | no | useful | no | N | 0 | 0 | dysembryoplastic neuroepithelial tumors (WHO I) | 90 | 100 | tumor free | 39 |
| **16** | 16 | F | 04/03/19 | partial seizures | 90 | left temporo-parietal | 1.19 | heterogeneous and faint | moderately fluorescent | no | useful | yes | N | 0 | 0 | ganglioglioma (WHO I) | 80 | 100 | tumor free | 34 |
| **17** | 15 | F | 15/05/19 | FU | 100 | left parietal | 4.11 | intense enhancement of the solid component with a large cyst | highly fluorescent (bright cystic fluid) | no | useful | yes | N | 0 | 0 | ganglioglioma (WHO I) | 100 | 100 | tumor free | 38 |
| **18** | 5 | F | 04/07/19 | seizures | 90 | left temporo-mesial | 10.02 | homogeneous and intense | highly fluorescent | no | useful | no | N | 0 | 0 | angiocentric glioma (WHO I) | 90 | 100 | tumor free | 37 |
| **19** | 14 | M | 17/09/19 | seizure | 90 | right parietal | 1.7 | intense enhancement of the solid component with a large cyst | highly fluorescent (bright cystic fluid) | no | useful | no | N | 0 | 0 | ganglioglioma (WHO I) | 90 | 100 | tumor free | 32 |
| **20**  **- 6*** | 9 | F | 16/12/19 | FU (functional impairment right superior limb, aphasia) | 90 | left temporal and lateral ventricle | 112.63 | intense enhancement of the solid component with a large cyst | highly fluorescent | no | useful | yes | Y – incomplete resection of the fluorescent component: infiltration of the CST | 2.2 | 2.51 | pilocytic astrocytoma (WHO I) | 90 | 90 | stable tumor | 31 |
| **21** | 11 | F | 19/12/19 | pituitary hormone deficiency, severe ipovisus | 60 | optic chiasmatic-hypothalamic | 22 | homogeneous and intense | moderately fluorescent | no | useful to verify adequacy of the biopsy | no | Y – biopsy | \ | \ | germ cell tumor | 60 | 80 | tumor regression (CHT) | 29 |
| **22**  **- 11*** | 15 | F | 02/03/20 | FU | 80 | III ventricle | 1.8 | heterogeneous and intense | highly fluorescent | no | useful | no | N | 0 | 0 | ependymoblastoma (WHO IV) | 80 | 80 | tumor free | 22 |
| **23** | 5 | M | 26/06/20 | left hemiparesis, visual loss | 60 | hypothalamic, optochiasmatic | 688.13 | heterogeneous and intense | highly fluorescent | no | useful | yes | Y – incomplete resection of the fluorescent component: infiltration of the optic chiasm | 31.1 | 214.13 | pilocytic astrocytoma (WHO I) | 60 | 70 | stable tumor | 23 |
| **24** | 9 | M | 04/08/20 | left VII c.n. deficit, ataxia | 70 | right thalamo-mesencephalic | 74.25 | intense enhancement of the solid component with a large cyst | moderately fluorescent | no | useful | yes | N | 0 | 0 | pilocytic astrocytoma (WHO I) | 80 | 90 | tumor free | 18 |
| **25** | 6 | M | 04/11/20 | optic neuropathy | 80 | chiasmatic hypothalamus | 34.63 | homogeneous and intense | highly fluorescent | no | useful | no | Y – incomplete resection of the fluorescent component: infiltration of the optic chiasm | 1.2 | 0.41 | pilocytic astrocytoma (WHO I) | 80 | 80 | stable tumor | 16 |
| **26** | 10 | M | 10/11/20 | asthenia, diplopia, headache | 90 | bithalamic | 156.13 | heterogeneous and faint | moderately fluorescent | no | useful to verify adequacy of the biopsy | no | Y – biopsy | \ | \ | H3K27M diffuse midline glioma (WHO IV) | 90 | 70 | progression disease (during adjuvant therapies) | 19 |
| **27** | 12 | M | 10/12/20 | seizure | 90 | right parietal | 2.06 | homogeneous and intense | faintly fluorescent | no | partial useful | no | N | 0 | 0 | polymorphous low-grade neuroepithelial tumor of the young (WHO I) | 90 | 90 | tumor free | 22 |
| **28** | 15 | M | 12/01/21 | seizure | 90 | left frontal | 1.96 | heterogeneous and intense | highly fluorescent | no | useful | no | N | 0 | 0 | dysembryoplastic neuroepithelial tumor (WHO I) | 90 | 100 | tumor free | 15 |
| **29** | 11 | M | 10/02/21 | absence seizure | 90 | right temporo-parietal | 39.38 | heterogeneous and faint | moderately fluorescent (bright cystic fluid) | no | ueseful | yes | N | 0 | 0 | dysembryoplastic neuroepithelial tumors (WHO I) | 90 | 90 | tumor free | 15 |
| **30** | 5 | F | 11/02/21 | seizure | 90 | left frontal | 2.86 | heterogeneous and faint | moderately fluorescent | no | not essential | yes | N | 0 | 0 | extraventricular neurocytoma (WHO II) | 90 | 90 | tumor free | 17 |
| **31** | 10 | M | 10/03/21 | seizure | 90 | right frontal | 65 | intense enhancement of the solid component with a large cyst | highly fluorescent | no | useful | yes | N | 4.7 | 3.04 | ganglioglioma (WHO I) | 90 | 100 | tumor free | 12 |
| **32** | 16 | F | 07/06/21 | seizure | 90 | right frontal | 0.65 | homogeneous and intense | highly fluorescent | no | useful | no | Y – incomplete resection of the fluorescent component: infiltration of the CST | 7.7 | 0.05 | ganglioglioma (WHO I) | 90 | 100 | stable tumor | 14 |
| **33** | 13 | M | 04/03/22 | headache | 100 | left frontal | 14 | intense enhancement of the solid component with a large cyst | moderately fluorescent (bright cystic fluid) | no | useful | no | N | 0 | 0 | pleomorphic xanthoastrocytoma (WHO 2) | 100 | 100 | tumor free | 6 |
